# Supplementary material
Source: HighWire-hosted journal article supplement (https://bmjopen.bmj.com/content/14/3/e077394)
Supplement: inline-supplementary-material-1 [file inline-supplementary-material-1.pdf]

APPENDIX

Table of Figures (Appendix)

Figure 1A. CMS Overall Hospital Quality Star Rating Methodology ..... 1

Table 1A. Dates of data for measures in Overall Hospital Quality Star Rating for the April 2021 update ... 2

Table 2A. Components of the Charlson Risk Adjustment methodology..... 7

Table 3A. Associations between star rating group scores for hospitals reporting 3, 4, or 5 groups, and in-hospital and 30-day risk-standardized mortality in patients hospitalized with COVID-19.....8

Figure 1A. CMS Overall Hospital Star Rating Methodology

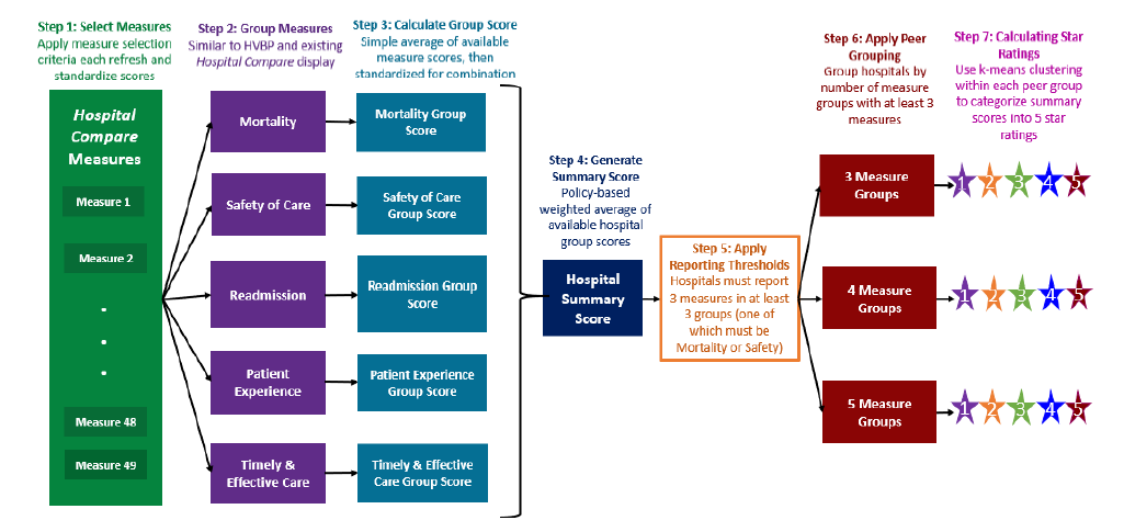

**Table 1 A. Dates of data for measures in Overall Hospital Quality Star Rating on Care Compare for the April 2021 update****Mortality**

| Measure                                                                                    | Dates                        |
|--------------------------------------------------------------------------------------------|------------------------------|
| MORT-30-AMI: 30-day death rate for heart attack patients                                   | July 1, 2016 - June 30, 2019 |
| MORT-30-CABG: Death rate for coronary artery bypass graft surgery patients                 | July 1, 2016 - June 30, 2019 |
| MORT-30-COPD: Death rate for chronic obstructive pulmonary disease (COPD) patients         | July 1, 2016 - June 30, 2019 |
| MORT-30-HF: 30-day death rate for heart failure patients                                   | July 1, 2016 - June 30, 2019 |
| MORT-30-PN: 30-day death rate for pneumonia patients                                       | July 1, 2016 - June 30, 2019 |
| MORT-30-STK: Death rate for stroke patients                                                | July 1, 2016 - June 30, 2019 |
| PSI-4-SURG-COMP: Death rate among surgical inpatients with serious treatable complications | July 1, 2017 - June 30, 2019 |

**Safety of Care**

| Measure                                                        | Dates                               |
|----------------------------------------------------------------|-------------------------------------|
| HAI-1: Central-line associated bloodstream infection (CLABSI)  | January 1, 2019 - December 31, 2019 |
| HAI-2: Catheter-associated urinary tract infection (CAUTI)     | January 1, 2019 - December 31, 2019 |
| HAI-3: Surgical site infection from colon surgery (SSI: Colon) | January 1, 2019 - December 31, 2019 |

| Measure                                                                                                               | Dates                               |
|-----------------------------------------------------------------------------------------------------------------------|-------------------------------------|
| HAI-4: Surgical site infection from abdominal hysterectomy (SSI-abdominal hysterectomy)                               | January 1, 2019 - December 31, 2019 |
| HAI-5: Methicillin-resistant staphylococcus aureus (or MRSA) blood infections (Antibiotic-resistant blood infections) | January 1, 2019 - December 31, 2019 |
| HAI-6: Clostridium difficile (or C. diff.) infections (Intestinal infections)                                         | January 1, 2019 - December 31, 2019 |
| COMP-HIP-KNEE: Rate of complications for hip and knee replacement patients                                            | April 1, 2016 - March 31, 2019      |
| PSI-90: Patient Safety and Adverse Events Composite                                                                   | July 1, 2017 - June 30, 2019        |

**Readmission**

| Measure                                                                                         | Dates                               |
|-------------------------------------------------------------------------------------------------|-------------------------------------|
| READM-30-CABG: Rate of unplanned readmission after coronary artery bypass graft (CABG) surgery  | July 1, 2016 - June 30, 2019        |
| READM-30-COPD: Rate of unplanned readmission for chronic obstructive pulmonary disease patients | July 1, 2016 - June 30, 2019        |
| READM-30-Hip-Knee: 30-day rate of readmission for hip and knee replacement patients             | July 1, 2016 - June 30, 2019        |
| READM-30-HOSP-WIDE: Rate of readmission after discharge from hospital                           | July 1, 2018 - June 30, 2019        |
| EDAC-30-AMI: Acute myocardial infarction excess days in acute care (EDAC)                       | July 1, 2016 - June 30, 2019        |
| EDAC-30-HF: Heart failure excess day sin acute care (EDAC)                                      | July 1, 2016 - June 30, 2019        |
| EDAC-30-PN: Pneumonia excess day sin acute care (EDAC)                                          | July 1, 2016 - June 30, 2019        |
| OP-32: Facility 7-day risk standardized hospital visit rate after outpatient colonoscopy        | January 1, 2017 - December 31, 2019 |
| OP-35 ADM: Admissions visits for patients receiving outpatient chemotherapy                     | January 1, 2019 - December 31, 2019 |
| OP-35 ED: Emergency department (ED) visits for patients receiving outpatient chemotherapy       | January 1, 2019 - December 31, 2019 |
| OP-36: Hospital visits after hospital outpatient surgery                                        | January 1, 2019 - December 31, 2019 |

**Patient Experience**

| Measure                                                                                                       | Dates                               |
|---------------------------------------------------------------------------------------------------------------|-------------------------------------|
| H-COMP-1: Communication with nurses                                                                           | January 1, 2019 - December 31, 2019 |
| H-COMP-2: Communication with doctors                                                                          | January 1, 2019 - December 31, 2019 |
| H-COMP-3: Responsiveness of hospital staff                                                                    | January 1, 2019 - December 31, 2019 |
| H-COMP-5: Communication about medicines                                                                       | January 1, 2019 - December 31, 2019 |
| H-COMP-6: Discharge information                                                                               | January 1, 2019 - December 31, 2019 |
| H-COMP-7: Care transition                                                                                     | January 1, 2019 - December 31, 2019 |
| H-CLEAN-HSP Cleanliness of hospital environment (Q8) + H-QUIET-HSP Quietness of hospital environment (Q9) / 2 | January 1, 2019 - December 31, 2019 |
| H-HSP-RATING Hospital rating (Q21) + H-RECMND: Willingness to recommend hospital (Q22) / 2                    | January 1, 2019 - December 31, 2019 |

**Timely and Effective Care**

| Measure                                                                                                                      | Dates                            |
|------------------------------------------------------------------------------------------------------------------------------|----------------------------------|
| IMM-3: Percent of healthcare workers vaccinated against Influenza                                                            | October 1, 2019 - March 31, 2020 |
| OP-10: Outpatient PA scans of the abdomen that were “combination” (double) scans                                             | July 1, 2018 - June 30, 2019     |
| OP-13: Medicare patients who got cardiac imaging stress tests to screen for surgical risk before low-risk outpatient surgery | July 1, 2018 - June 30, 2019     |

| Measure                                                                                                                                                       | Dates                               |
|---------------------------------------------------------------------------------------------------------------------------------------------------------------|-------------------------------------|
| OP-18b: Average time patients spent in the emergency department before being sent home                                                                        | January 1, 2019 - December 31, 2019 |
| OP-22: Percentage of patients who left the emergency department before being seen                                                                             | January 1, 2019 - December 31, 2019 |
| OP-23: Percentage of patients who came to the emergency department with stroke symptoms who received brain scan results within 45 minutes of arrival          | January 1, 2019 - December 31, 2019 |
| OP-29: Appropriate follow-up interval for normal colonoscopy in average risk patients                                                                         | January 1, 2019 - December 31, 2019 |
| OP-33: External beam radiotherapy for bone metastases                                                                                                         | January 1, 2019 - December 31, 2019 |
| OP-3b: Average number of minutes before outpatients with chest pain or possible heart attack who needed specialized care were transferred to another hospital | January 1, 2019 - December 31, 2019 |
| OP-8: Outpatients with low back pain who had an MRI without trying recommended treatments first, such as physical therapy                                     | July 1, 2018 - June 30, 2019        |
| PC-01: Percent of newborns whose deliveries were scheduled too early (1-3 weeks early), when a scheduled delivery was not medically necessary                 | January 1, 2019 - December 31, 2019 |
| SEP-1: Percentage of patients who received appropriate care for severe sepsis and septic shock                                                                | January 1, 2019 - December 31, 2019 |

**Table 2 A. Components of the Charlson Risk Adjustment methodology<sup>1</sup>**

| Description                                          |
|------------------------------------------------------|
| All                                                  |
| Age                                                  |
| Unknown: #, %                                        |
| Mean, Standard Deviation                             |
| Minimum, Maximum                                     |
| 1st Percentile, 99th Percentile                      |
| 1st Quartile, 3rd Quartile                           |
| Median, Quartile Range                               |
| Myocardial Infarction (Yes/No)                       |
| Congestive Heart Failure (Yes/No)                    |
| Peripheral Vascular Disease (Yes/No)                 |
| Cerebrovascular Disease (Yes/No)                     |
| Dementia (Yes/No)                                    |
| Chronic Pulmonary Disease (Yes/No)                   |
| Connective Tissue Disease-Rheumatic Disease (Yes/No) |
| Peptic Ulcer Disease (Yes/No)                        |
| Mild Liver Disease (Yes/No)                          |
| Diabetes without complications (Yes/No)              |
| Diabetes with complications (Yes/No)                 |
| Paraplegia and Hemiplegia (Yes/No)                   |
| Renal Disease (Yes/No)                               |
| Cancer (Yes/No)                                      |

|                                           |
|-------------------------------------------|
| Moderate or Severe Liver Disease (Yes/No) |
| Metastatic Carcinoma (Yes/No)             |
| AIDS/HIV (Yes/No)                         |

**Table 3A: Associations between star rating group scores for hospitals reporting 3, 4, or 5 groups, and in-hospital and 30-day risk-standardized mortality in patients hospitalized with COVID-19.**

|                                | Correlation Coefficient (number of hospitals) |                       |                         |                            |                                |                                       |
|--------------------------------|-----------------------------------------------|-----------------------|-------------------------|----------------------------|--------------------------------|---------------------------------------|
|                                | All p values <0.05 unless noted with an *     |                       |                         |                            |                                |                                       |
| Hospital Characteristic        | Hospital Summary Score                        | Mortality Group Score | Readmission Group Score | Safety of Care Group Score | Patient Experience Group Score | Timely and Effective Care Group Score |
| Peer Group 3: In-hospital RSMR | -0.29 (318)                                   | -0.14 (292)           | -0.28 (318)             | -0.04* (186)               | -0.35 (65)                     | -0.06* (312)                          |
| Peer Group 3: 30-day RSMR      | -0.23 (318)                                   | -0.25 (292)           | -0.14 (218)             | -0.03* (186)               | -0.11* (65)                    | -0.10* (312)                          |
| Peer Group 4: In-hospital RSMR | -0.31 (540)                                   | -0.07* (528)          | -0.28 (540)             | 0.07* (487)                | -0.39 (531)                    | -0.24 (539)                           |
| Peer Group 4: 30-day RSMR      | -0.28 (540)                                   | -0.18 (528)           | -0.15 (540)             | 0.06* (487)                | -0.36 (531)                    | -0.16 (539)                           |
| Peer Group 5: In-hospital RSMR | -0.40 (2,458)                                 | -0.15 (2,458)         | -0.22 (2,458)           | -0.16 (2,458)              | -0.38 (2,458)                  | -0.30 (2,458)                         |
| Peer Group 5: 30-day RSMR      | -0.40 (2,458)                                 | -0.33 (2,458)         | -0.17 (2,458)           | -0.04* (2,458)             | -0.35 (2,458)                  | -0.10 (2,458)                         |

\*p-value not significant

References (Appendix)

1. Charlson ME, Pompei P, Ales KL, MacKenzie CR. A new method of classifying prognostic comorbidity in longitudinal studies: development and validation. J Chronic Dis 1987;40:373-383.
